# Supplementary material
Source: publisher site journal article supplement (https://www.dovepress.com/article/469651)
Supplement: Supplementary file 1 [file get_supplementary_file.php]

**Supplementary Materials**

**Supplementary Information 1**

**Middle cerebral artery occlusion/reperfusion (MCAO/R) surgery**

(1) Induce and maintain deep anesthesia in mice using isoflurane. Ensure the body temperature is maintained at 37 ± 0.5 °C during the surgery.

(2) Shave the hair off the mice’s neck. Sterilize the skin at the surgical site with iodophor.

(3) Make a 1 cm incision along the midline of the neck with a scalpel. Use retractors to pull the skin and salivary glands outward, exposing the sternocleidomastoid and cervical muscles.

(4) Separate the muscles to expose the carotid artery region. Determine the vascular anatomy of the common carotid artery (CCA), internal carotid artery (ICA), and external carotid artery (ECA).

(5) Secure the ECA and ICA temporarily with silk sutures and clamp the CCA with an arterial clip to block blood flow.

(6) Make a small incision on the distal side of the arterial clip and insert a silicon-coated nylon monofilament into the CCA. Loosen the silk suture fixing the ICA, insert the nylon monofilament into the ICA until there is a slight resistance to stop.

(7) Secure the nylon monofilament and the vessel with silk sutures to prevent displacement of the occlusion site. Record the time of ischemia onset.

(8) Gently withdraw the nylon monofilament and ligate the CCA with silk sutures to prevent bleeding at the incision after 1 hour of ischemia.

(9) Suture the neck incision and administer penicillin to protect against infection.

(10) Provide soft food after the surgery and monitor the animal’s vital signs.

**Supplementary Information 2 Primary microglia and astrocytes culture**

Mouse primary microglia were obtained from newborn pups (within 24 h). After removing the meninges and blood vessels in ice-cold Hank’s balanced salt solution, cortices were cut into small pieces. The tissue was digested with 0.125% trypsin and DNase solution (0.125mg/ml) for 20 min at 37 °C. After termination of digestion, the single-cell suspension was filtered with a 70-μm cell strainer. The mixed glial cells were plated onto T-25 flasks precoated with cell adhesion agent after centrifugation and resuspension. These cells were cultured in DMEM/F12 medium containing 10% fetal bovine serum under 5% CO2 at 37 °C. The cell culture medium was changed 24 h after plating, then renewed every 3 days. 10 to 12 days later, floating microglia were separated from mixed glial cells by orbital shaking at 180 rpm for 1 h at 37 °C. The obtained microglia were seeded onto new T-25 flasks and the medium was replaced with a new one when the cells were attached to the bottom of the flask. For astrocytes isolation, the remaining adherent monolayers of astrocytes were digested with trypsin and used for further experiments.

**Supplementary Information 3 Immunofluorescence staining**

(1) Deparaffinization/Hydration

a. Incubate sections in xylene two times for 20 min each.

b. Rehydrate tissue with graded alcohol incubations: 100% ethanol 5 min→90% ethanol 5 min→75% ethanol 5 min→50% ethanol 5 min→dH2O 5 min

(2) Antigen Unmasking

a. Using a microwave, bring sections to a boil in 1 mM EDTA, pH 8.0.

b. Maintain at a sub-boiling temperature for 20 min.

c. Cool sections to room temperature (RT).

d. Wash sections in PBS three times for 5 min each.

(3) Blocking nonspecific epitopes

a. Incubate sections in 3% H2O2 at RT for 15 min to inactivate endogenous peroxidases.

b. Wash sections in PBS three times for 5 min each.

c. Incubate sections in 8% goat serum at RT for 1 h.

d. Wash sections in PBS three times for 5 min each.

(4) Binding with antibody

a. Incubate sections with diluted primary antibody at 4 °C overnight.

b. Wash sections in PBS three times for 5 min each.

c. Incubate sections HRP-conjugated secondary antibody at RT for 2 h.

d. Wash sections in PBS three times for 5 min each.

(6) Reacting with fluorescent tyramide substrate

a. Incubate sections with prepared tyramide working solution at RT in the dark for 10 min.

b. Wash sections in PBS three times for 5 min each.

c. If performing multiplex staining, please repeat Step (2)-(6).

(7) Mounting

Mount sections with coverslips using mounting mediums with DAPI.


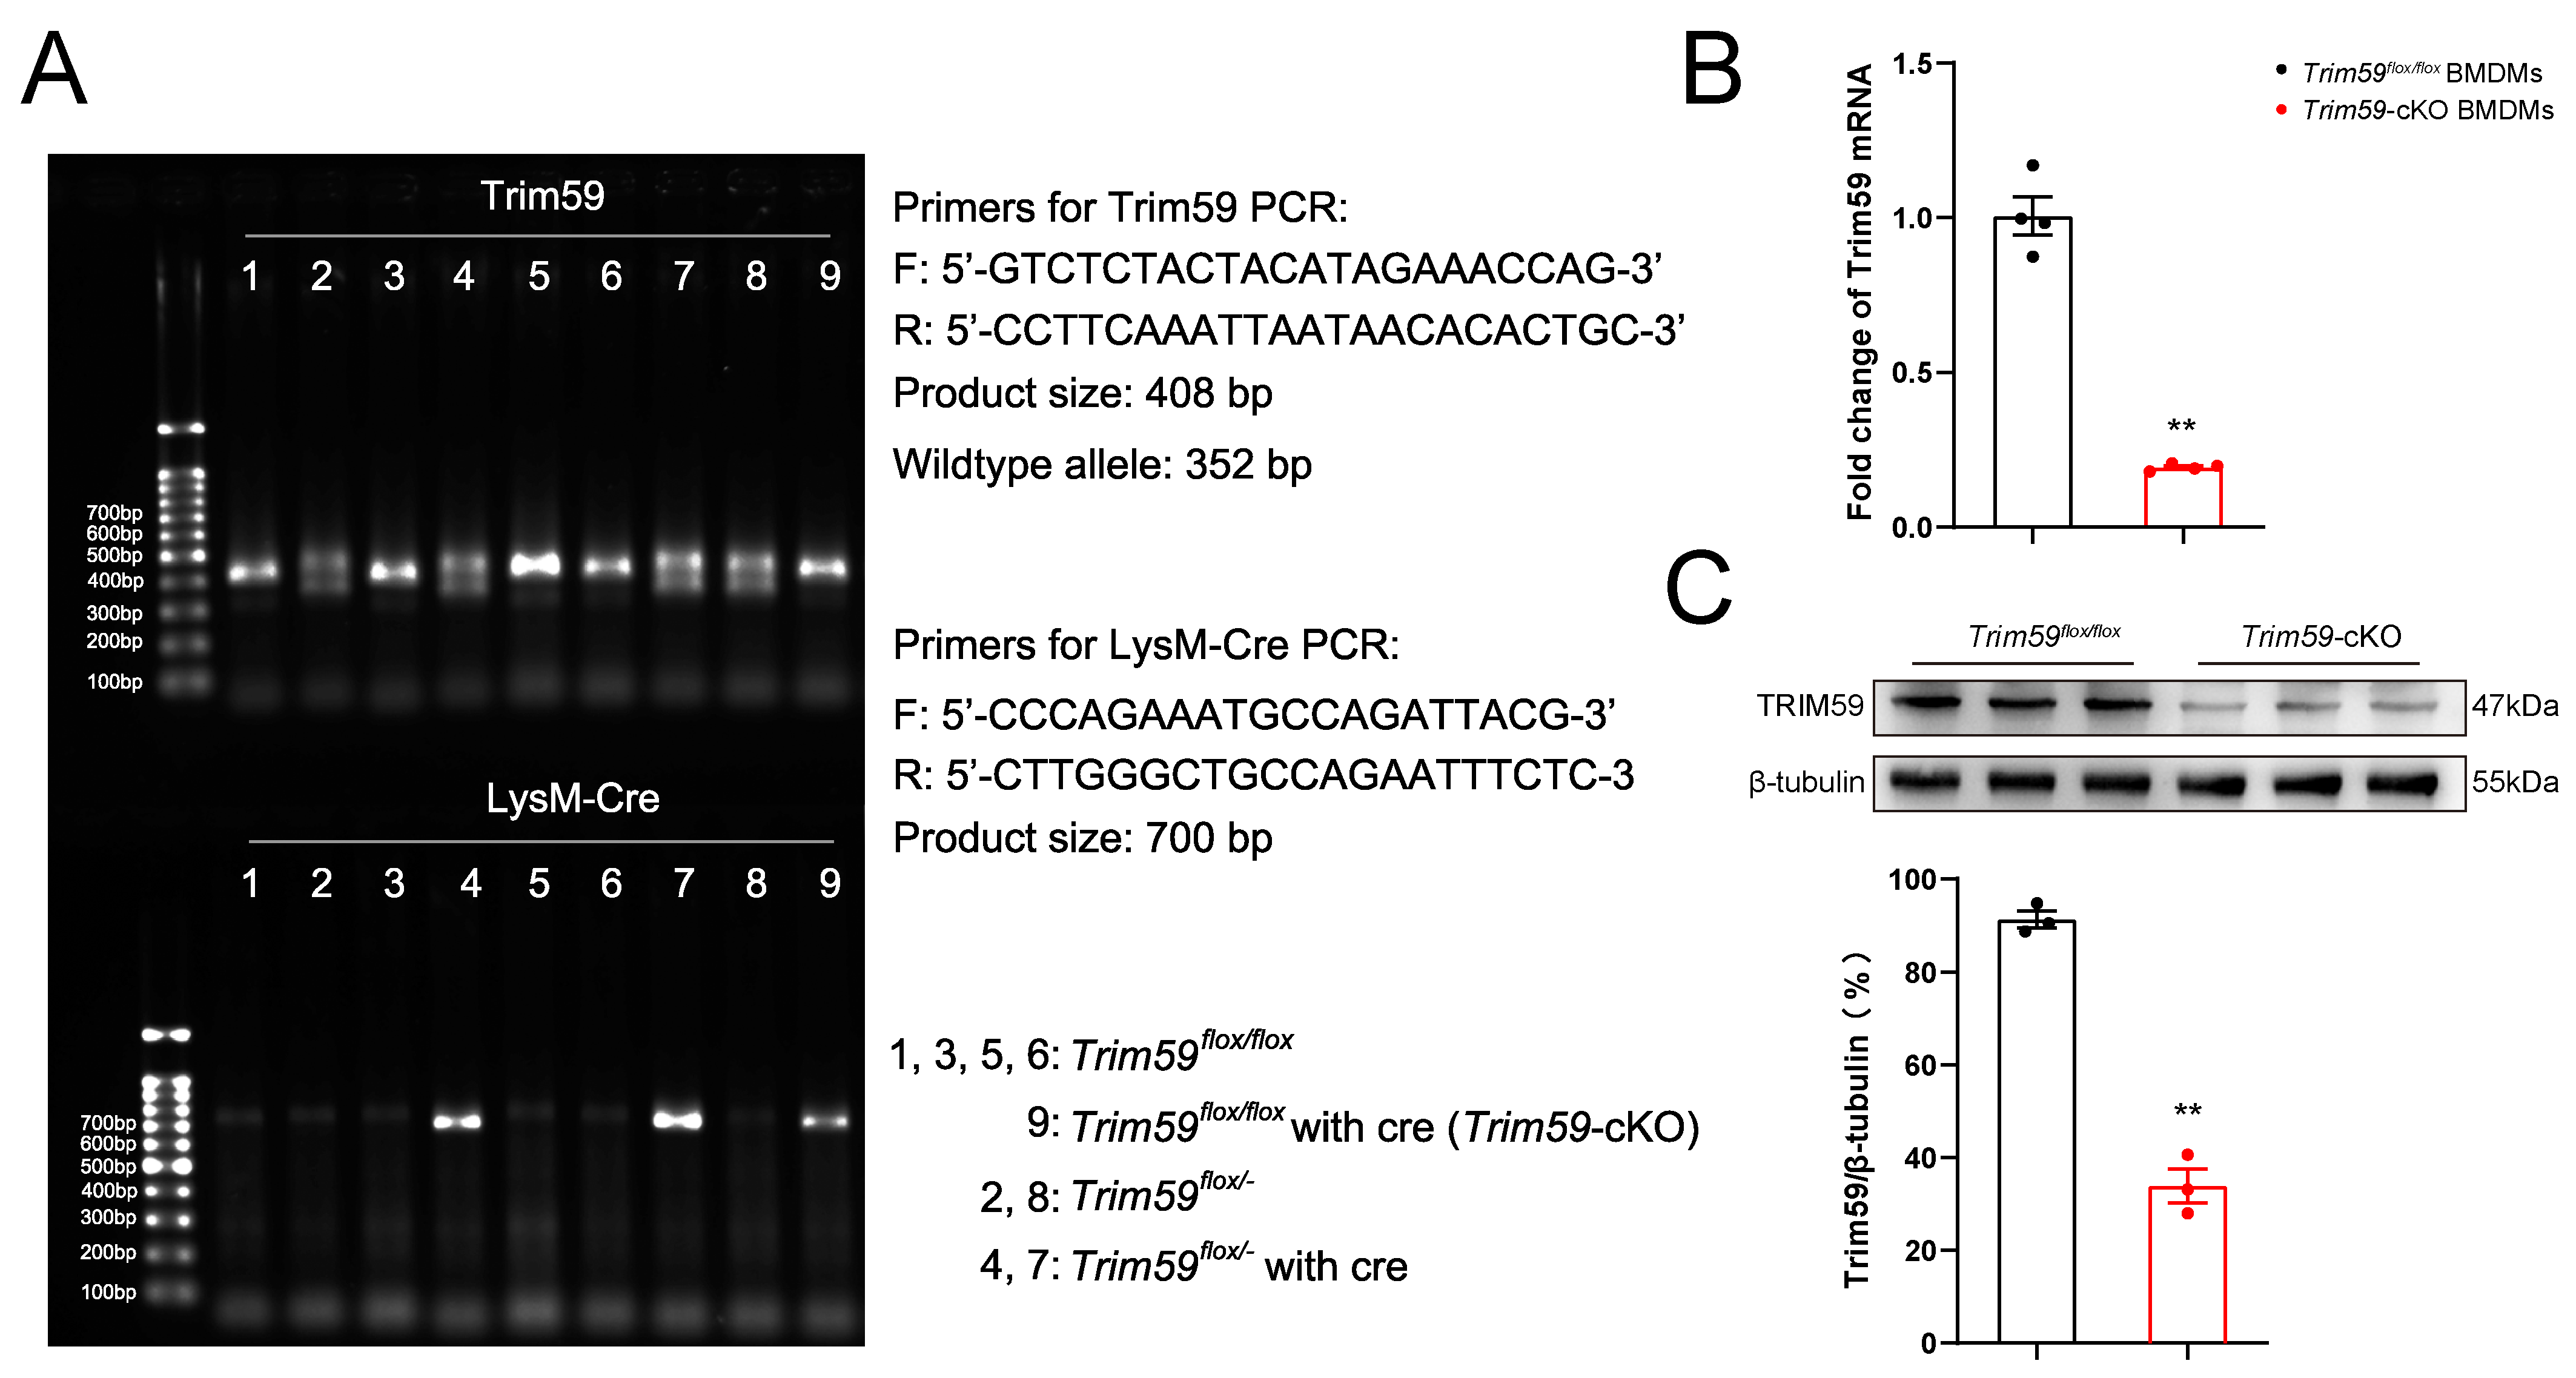


**Supplementary Figure 1.** The genotypic identification of *Trim59flox/flox* mice and *Trim59*-cKO mice. **(A)** Genotype identification of mice. **(B)** The mRNA level of TRIM59 in BMDMs from *Trim59flox/flox* and *Trim59*-cKO mice (n=4). **(C)** The protein level of TRIM59 in BMDMs (n=3). Data are represented as mean ± SEM. **P < 0.01 compared to *Trim59flox/flox*mice.


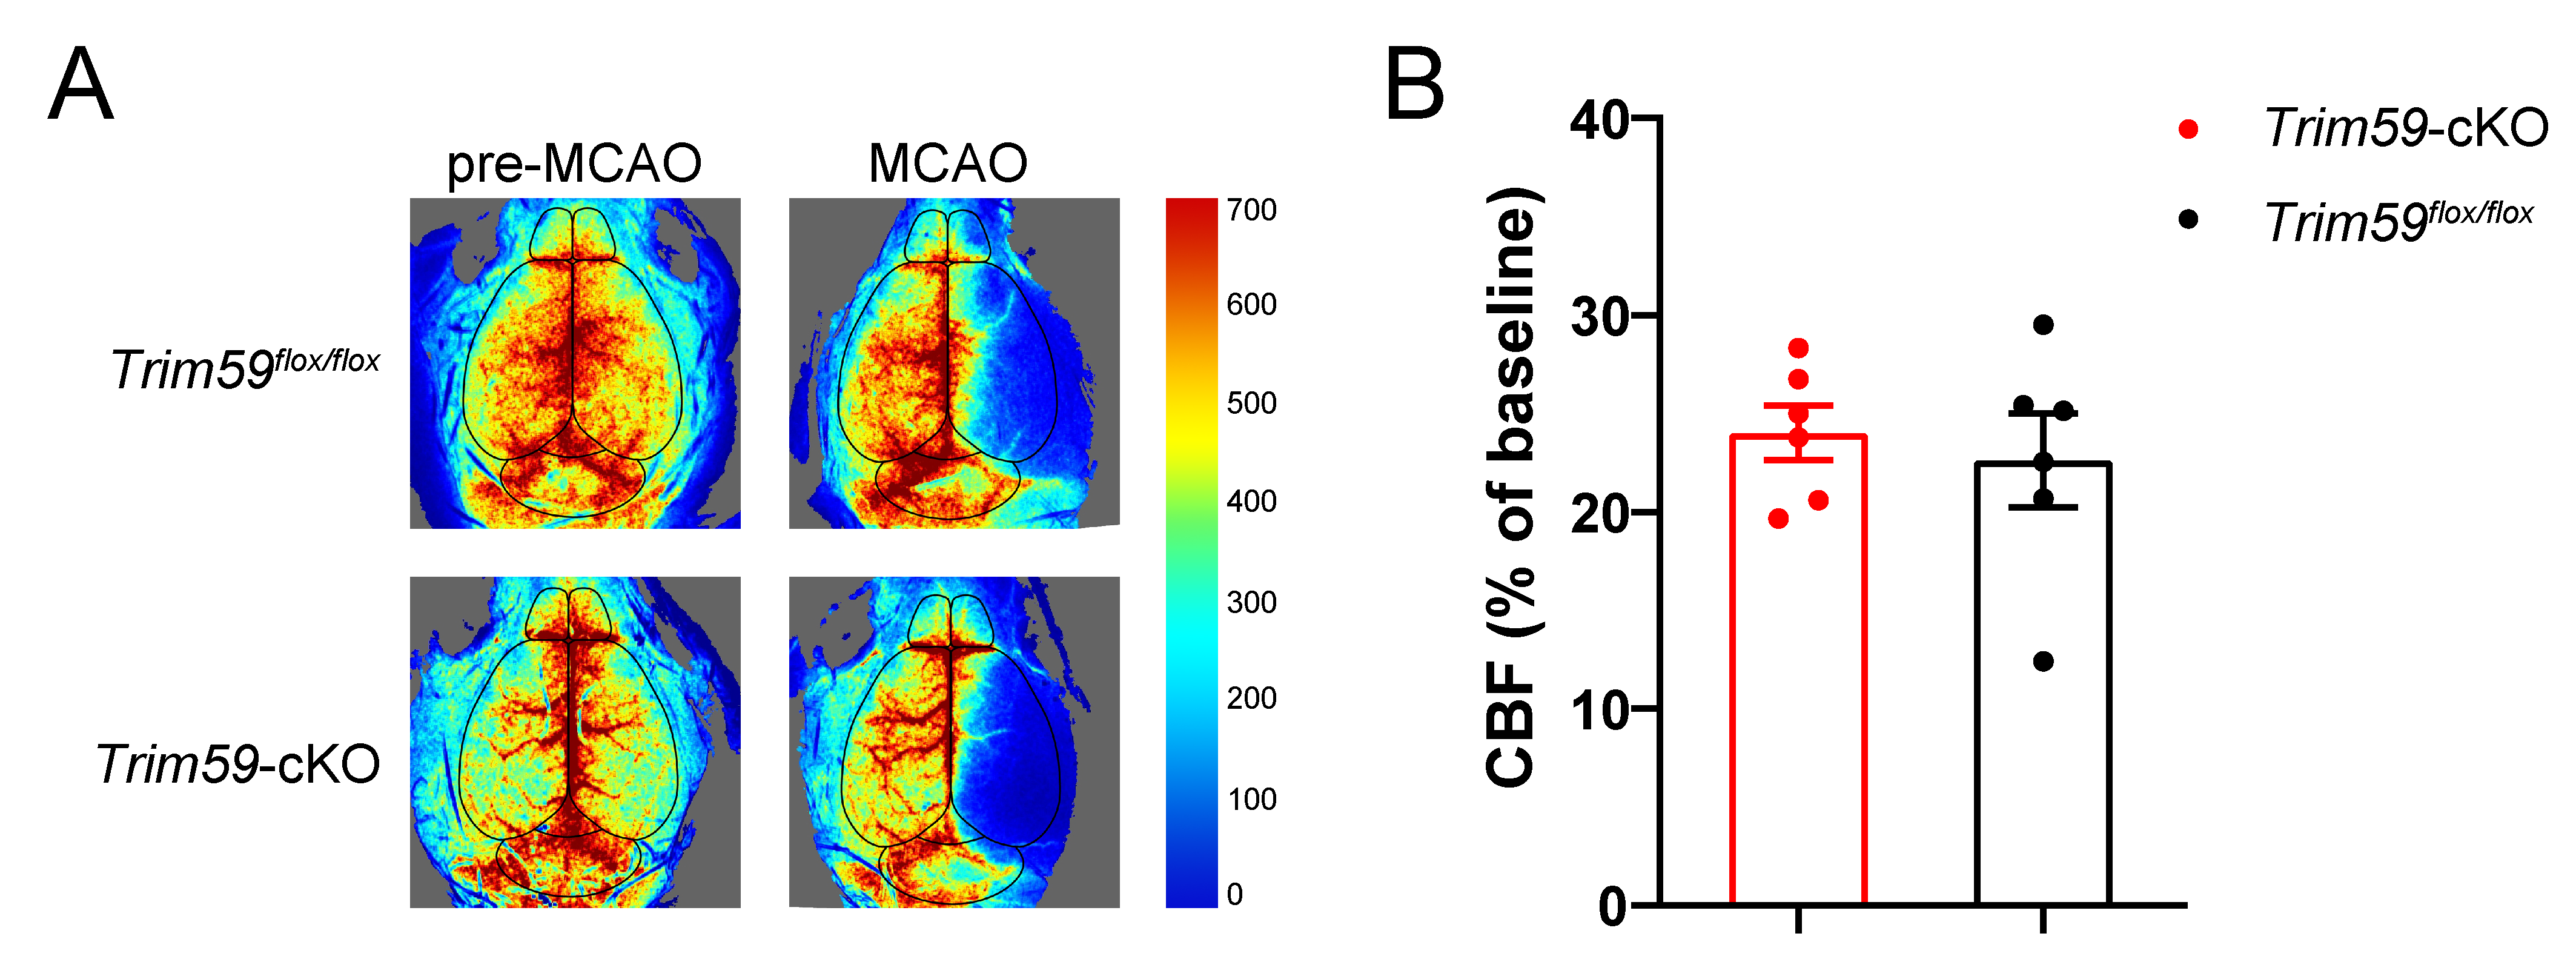


**Supplementary Figure 2.** Cerebral blood flow (CBF) changes before and after middle cerebral artery occlusion (MCAO) surgery in two strains of mice. There was no significant difference in decreased CBF between *Trim59flox/flox*and *Trim59*-cKO mice after surgery. **(A)** Representative laser speckle images of CBF before and after MCAO surgery. **(B)** Quantification of CBF as percentages of the baseline levels. Data are represented as mean ± SEM. n=6 mice per group.


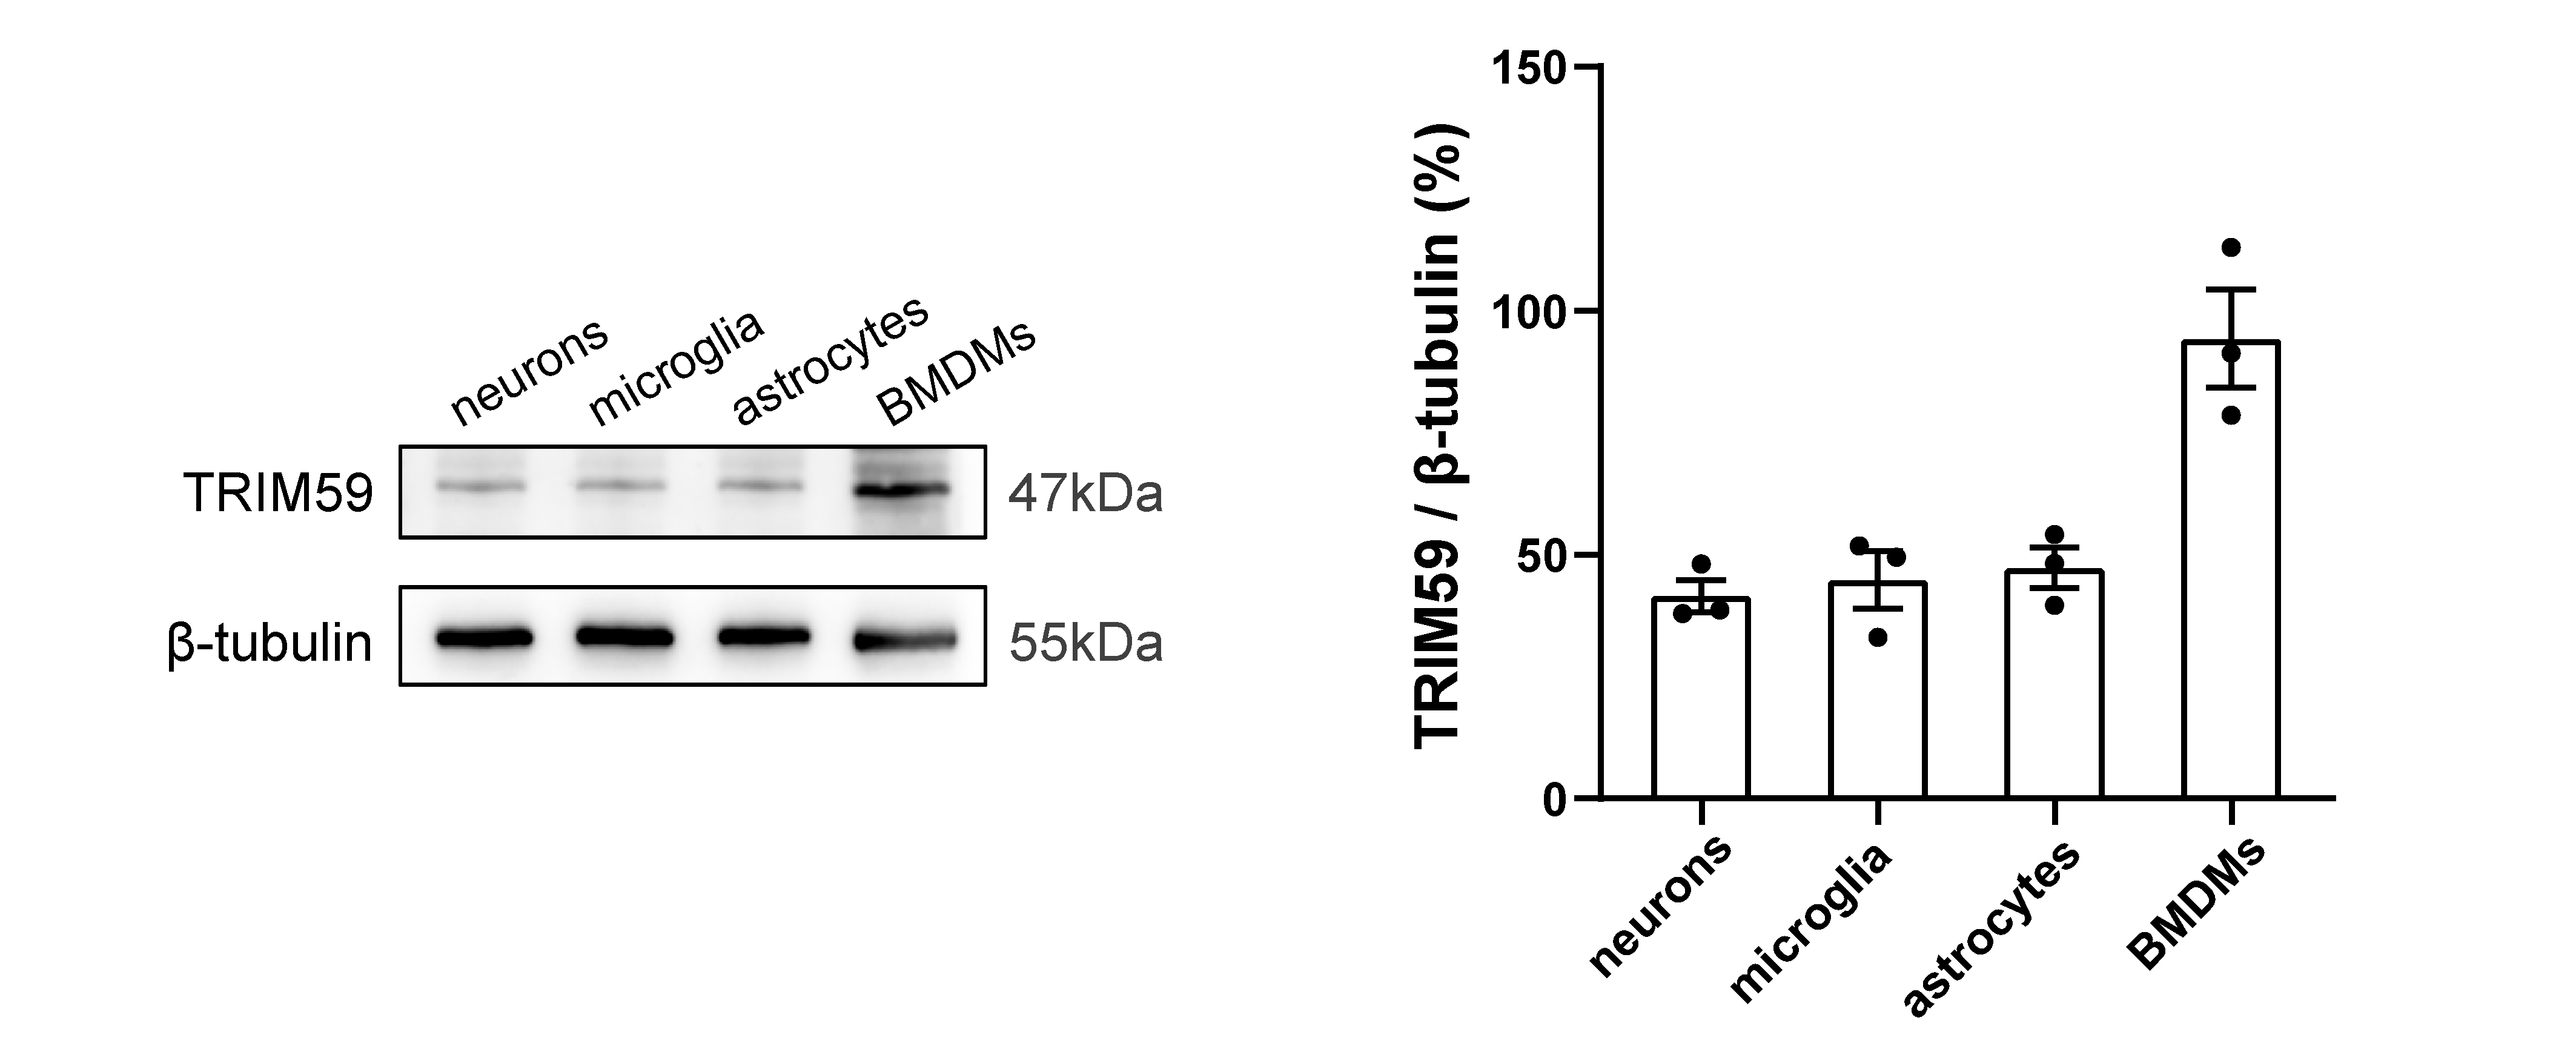


**Supplementary Figure 3.** Representative Western blot images and quantified data of TRIM59 expression in different primary cells (n=3). Data are represented as mean ± SEM. Under normal physiological conditions, TRIM59 is lowly expressed in mouse primary neurons, microglia, and astrocytes, while highly expressed in BMDMs.

**
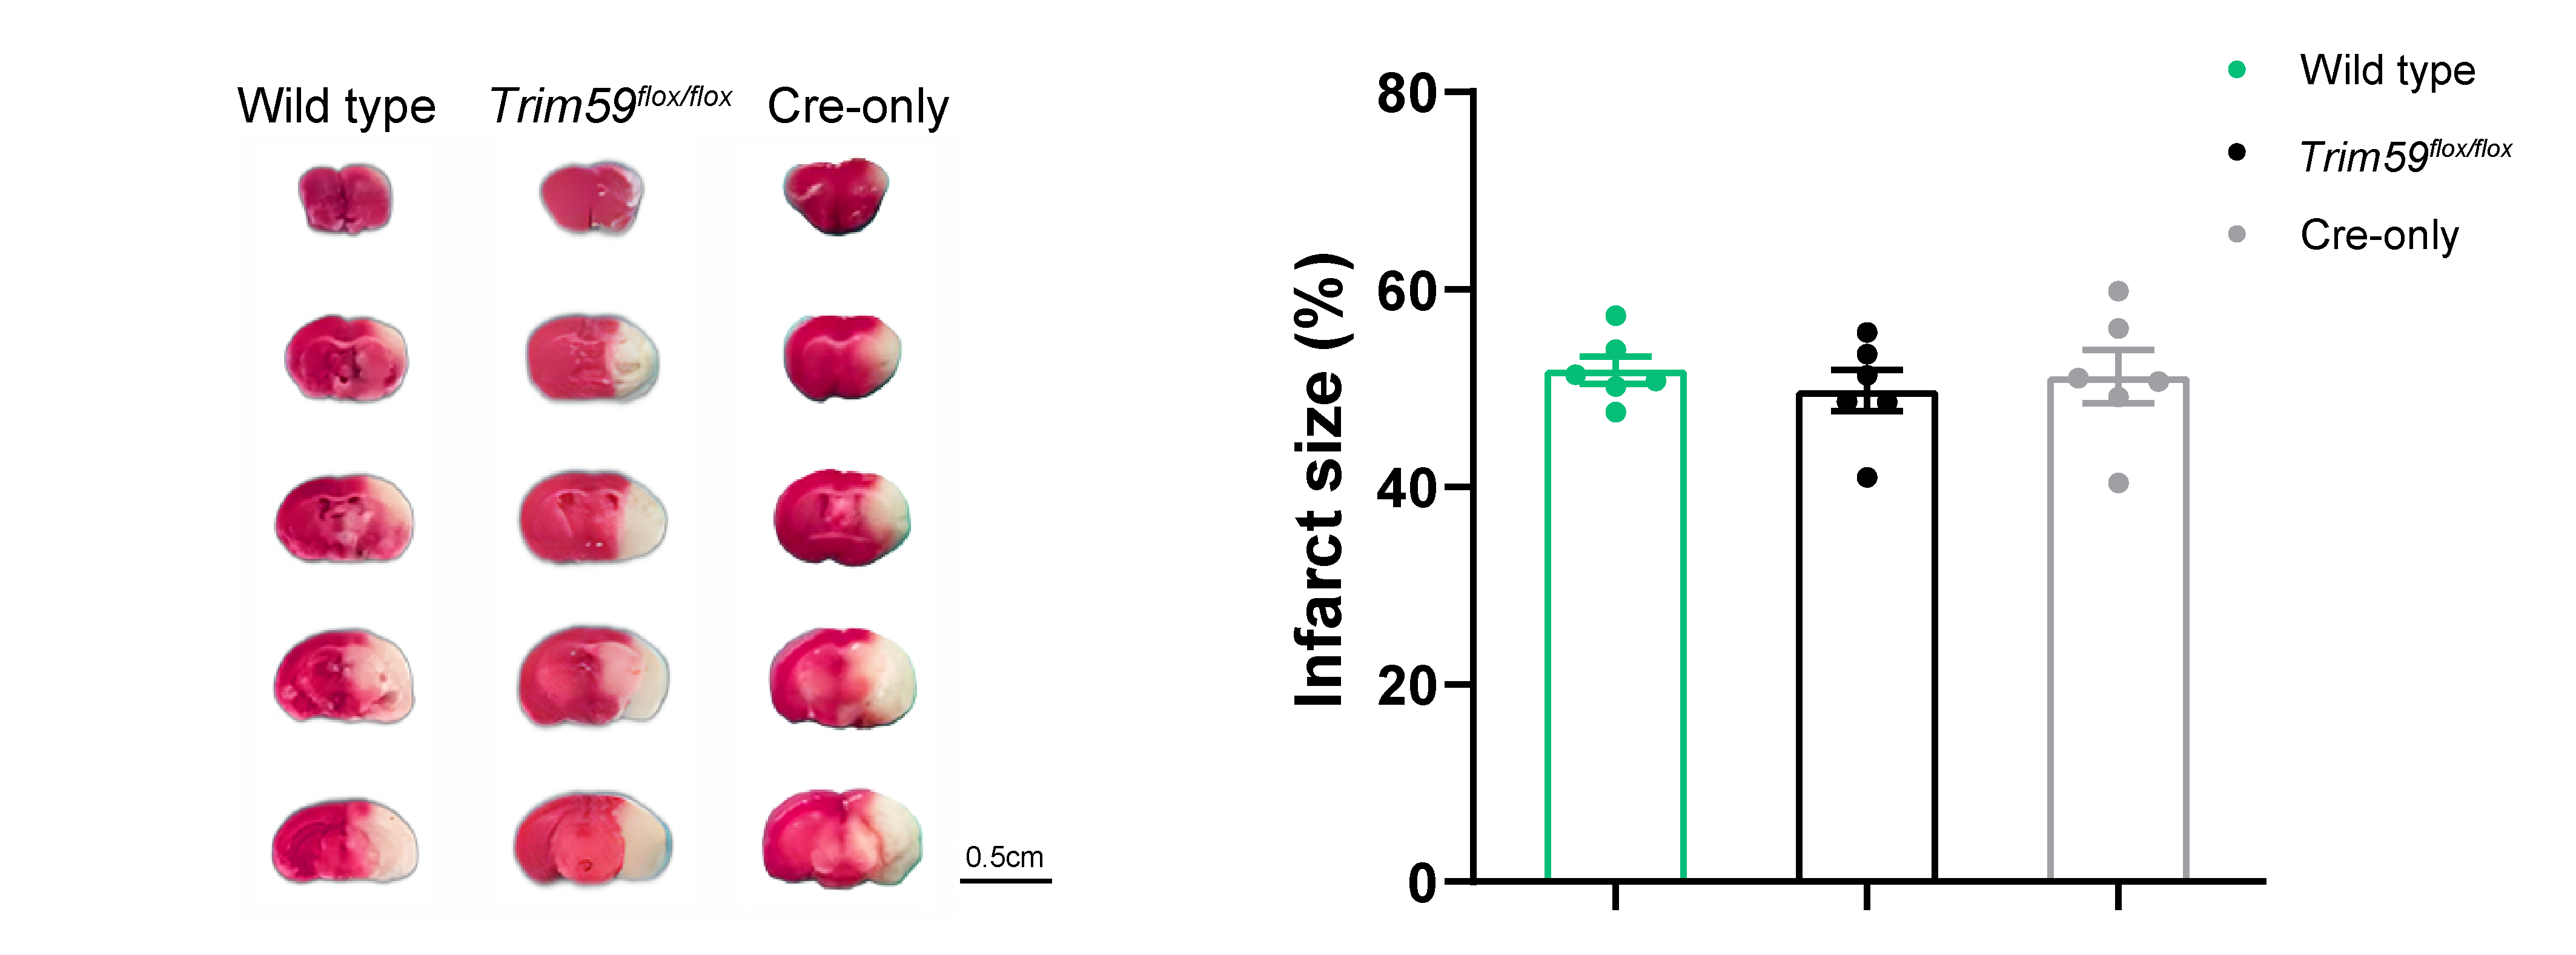
**

**Supplementary Figure 4.** Representative TTC staining images and quantification of infarct size of different genotypes of mice. Data are represented as mean ± SEM. n=6 mice per group. There was no significant difference in infarct size among wild type mice, *Trim59flox/flox*mice, and Cre-only mice after MCAO/R surgery.

**
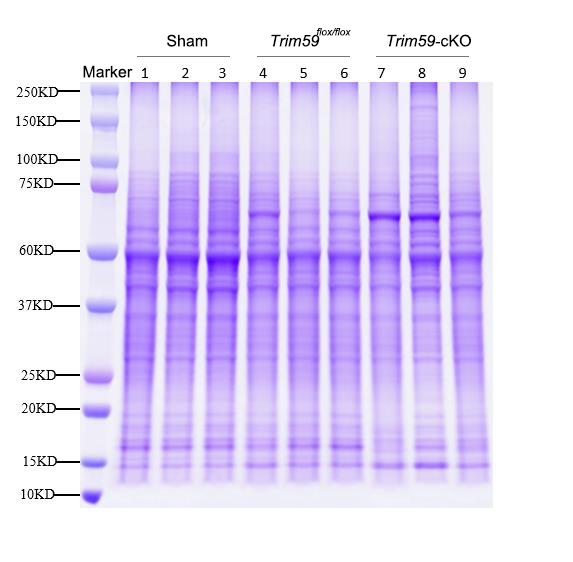
**

**Supplementary Figure 5.** Coomassie blue staining of total proteins extracted from brain tissues in different groups. The sample proteins did not degrade since the protein bands were clear and distinguishable, which met the experimental needs.

**Supplementary Table 1.** MaxQuant identification and quantitation indexes

| Item | Value |
| --- | --- |
| Maximum missed cleavages | 2 |
| Fixed modifications | Carbamidomethylation |
| Variable modifications | Oxidation |
| Main search | ± 6 ppm |
| First search | ± 20 ppm |
| MS/MS Tolerance | 20 ppm |
| Database pattern | Reverse |
| Protein false discovery rate | ≤0.01 |
| Peptide false discovery rate | ≤0.01 |
| Peptides used for protein quantification | Use razor and unique peptides |
| Protein Quantification | Label-free quantification |

**Supplementary Table 2.** The total amount of extracted protein

| No. | Sample | Volume (μl) | Concentration (μg/μl) | Total protein (μg) |
| --- | --- | --- | --- | --- |
| 1 | Sham1 | 450 | 8.163 | 3673.4 |
| 2 | Sham2 | 450 | 8.232 | 3704.4 |
| 3 | Sham3 | 450 | 7.605 | 3422.3 |
| 4 | *Trim59flox/flox*1 | 450 | 6.165 | 2774.3 |
| 5 | *Trim59flox/flox*2 | 450 | 7.435 | 3345.8 |
| 6 | *Trim59flox/flox*3 | 450 | 7.224 | 3250.8 |
| 7 | *Trim59*-cKO1 | 450 | 6.061 | 2727.5 |
| 8 | *Trim59*-cKO2 | 450 | 6.429 | 2893.1 |
| 9 | *Trim59*-cKO3 | 450 | 5.938 | 2672.1 |
